# Supplementary material
Source: ML conference proceedings conference paper supplement (https://openreview.net/forum?id=_X12NmQKvX)
Supplement: supplementary_material [file attachment]

The code is uploaded and can be found at

<https://www.dropbox.com/scl/fo/xxalhio8d99etasdoco5v/h?dl=0&rlkey=rkpudcpticsaixdcuzv8ux40y>

To run the code, you need to first set up the environment given in requirements.txt.  
It is recommended to use anaconda for installation.

After the installation, you need to create a file folder for experiments. The structure of the file folder should be

```
TILP/  
TILP/src/  
TILP/data/WIKIDATA12k/  
TILP/data/YAGO11k/  
TILP/output/found_rules/  
TILP/output/found_t_s/  
TILP/output/train_weights_tfm/  
TILP/output/train_weights/  
TILP/output/learned_rules/  
TILP/output/explore_res/  
TILP/output/rank_dict/
```

For the datasets, we use WIKIDATA12k and YAGO11k which can be downloaded here  
<https://zenodo.org/record/4286007#.Y3Z43nbMKUI>

To run the code, simply use the command  
python main.py
